# Supplementary material for: Nebulized glycyrrhizin/enoxolone drug modulates IL-17A in COVID-19 patients: a randomized clinical trial
Source: Front Immunol. 2024 Jan 12;14:1282280. doi: 10.3389/fimmu.2023.1282280 (PMC10811189; doi:10.3389/fimmu.2023.1282280)
Supplement: Supplementary file 4 [file Table_2.xlsx]

## Sheet: VITAL SIGNS
Supplementary Table 2.1 Summary of vital signs by day and group.
The means and standard deviations (SD) values are showed. Control group (0.9% saline solution), Group A (30/2 mg GA/18β), Group B (90/4 mg GA/18β).
Variable	Group	Day 0	Day 1	Day 2	Day 3	Day 4	Day 5	Day 6	Day 7	Day 8	Day 9	Day 10	Day 11	Day 12	Day 13	Day 14	Day 15	Day 16	Day 30
Systolic Blood Pressure mm/Hg	CONTROL	107 ± 9	105 ± 9	106 ± 8	104 ± 10	106 ± 8	107 ± 8	106 ± 9	106 ± 7	103 ± 10	104 ± 7	105 ± 6	105 ± 10	105 ± 7	104 ± 9	107 ± 8	104 ± 8	102 ± 9	106 ± 7
	A	103 ± 9	102 ± 9	106 ± 7	105 ± 9	105 ± 9	106 ± 8	107 ± 7	106 ± 10	104 ± 8	104 ± 9	103 ± 9	104 ± 8	102 ± 8	103 ± 7	100 ± 7	103 ± 8	103 ± 7	105 ± 7
	B	107 ± 9	107 ± 9	104 ± 7	109 ± 7	105 ± 9	106 ± 9	106 ± 6	107 ± 7	106 ± 7	105 ± 7	105 ± 7	105 ± 8	106 ± 6	106 ± 6	107 ± 7	107 ± 5	107 ± 7	106 ± 5
Diastolic Blood Pressure mm/Hg	CONTROL	69 ± 7	69 ± 7	71 ± 5	69 ± 3	69 ± 5	71 ± 6	72 ± 4	72 ± 6	70 ± 6	70 ± 5	69 ± 5	70 ± 5	71 ± 6	69 ± 6	71 ± 5	71 ± 5	69 ± 5	70 ± 5
	A	68 ± 6	66 ± 6	69 ± 7	69 ± 5	70 ± 6	71 ± 6	69 ± 7	71 ± 7	69 ± 6	70 ± 6	68 ± 6	66 ± 5	68 ± 5	68 ± 7	68 ± 5	66 ± 6	68 ± 7	70 ± 5
	B	69 ± 7	72 ± 8	71 ± 5	71 ± 6	70 ± 7	69 ± 6	71 ± 8	71 ± 5	69 ± 4	71 ± 5	69 ± 6	70 ± 6	69 ± 7	68 ± 5	69 ± 8	71 ± 4	70 ± 5	68 ± 6
Heart Rate beats per minute	CONTROL	76 ± 9	74 ± 9	72 ± 8	69 ± 5	72 ± 5	73 ± 7	75 ± 8	73 ± 8	74 ± 10	72 ± 9	74 ± 11	72 ± 10	71 ± 10	73 ± 10	74 ± 7	74 ± 8	70 ± 5	71 ± 8
	A	74 ± 10	77 ± 10	77 ± 12	71 ± 11	74 ± 10	72 ± 9	75 ± 10	73 ± 6	72 ± 8	73 ± 7	70 ± 6	71 ± 7	72 ± 7	72 ± 8	75 ± 10	73 ± 7	72 ± 7	73 ± 6
	B	73 ± 14	74 ± 12	76 ± 15	71 ± 13	70 ± 11	71 ± 12	70 ± 9	73 ± 8	72 ± 11	70 ± 9	73 ± 9	71 ± 10	71 ± 12	69 ± 8	71 ± 11	71 ± 9	68 ± 6	69 ± 8
Breathing Frequency breaths per minute	CONTROL	19 ± 1	19 ± 1	19 ± 1	19 ± 1	18 ± 1	18 ± 1	19 ± 1	19 ± 1	19 ± 1	19 ± 1	19 ± 1	19 ± 1	18 ± 1	18 ± 1	18 ± 1	19 ± 1	19 ± 1	19 ± 1
	A	18 ± 2	19 ± 1	18 ± 2	18 ± 2	19 ± 1	19 ± 2	19 ± 1	19 ± 2	19 ± 1	18 ± 2	19 ± 2	18 ± 1	19 ± 1	18 ± 1	18 ± 1	18 ± 1	18 ± 1	19 ± 1
	B	19 ± 1	19 ± 1	18 ± 1	18 ± 1	18 ± 1	18 ± 1	18 ± 1	18 ± 1	18 ± 1	18 ± 1	18 ± 1	18 ± 1	18 ± 1	18 ± 1	18 ± 1	18 ± 1	18 ± 1	19 ± 1
Temperature °C	CONTROL	36.7 ± 0.5	36.5 ± 0.5	36.0 ± 0.4	36.0 ± 0.3	35.9 ± 0.4	36.0 ± 0.4	36.1 ± 0.4	36.1 ± 0.5	35.9 ± 0.3	35.9 ± 0.4	35.9 ± 0.4	35.9 ± 0.4	36.0 ± 0.3	36.0 ± 0.3	36.0 ± 0.2	36.0 ± 0.3	36.1 ± 0.2	36.1 ± 0.1
	A	36.1 ± 0.7	36.1 ± 0.5	36.0 ± 0.4	36.1 ± 0.4	36.0 ± 0.3	36.0 ± 0.5	36.0 ± 0.3	36.0 ± 0.4	36.0 ± 0.3	35.9 ± 0.4	36.0 ± 0.3	36.1 ± 0.3	36.0 ± 0.2	36.0 ± 0.4	36.1 ± 0.2	36.1 ± 0.2	36.1 ± 0.3	36.1 ± 0.2
	B	36.4 ± 0.5	36.3 ± 0.5	36.2 ± 0.5	36.1 ± 0.4	36.1 ± 0.3	36.0 ± 0.3	36.1 ± 0.4	36.0 ± 0.3	36.1 ± 0.4	36.1 ± 0.3	36.0 ± 0.3	36.1 ± 0.4	36.0 ± 0.3	36.0 ± 0.3	35.9 ± 0.4	36.0 ± 0.3	36.2 ± 0.2	36.2 ± 0.2
Oxygen saturation %	CONTROL	94 ± 2	95 ± 2	95 ± 2	95 ± 2	95 ± 2	96 ± 2	96 ± 2	95 ± 2	95 ± 2	95 ± 2	95 ± 2	95 ± 2	95 ± 3	95 ± 2	95 ± 2	96 ± 2	96 ± 2	95 ± 2
	A	95 ± 2	95 ± 2	95 ± 2	96 ± 2	96 ± 2	96 ± 1	95 ± 2	96 ± 1	95 ± 2	96 ± 2	95 ± 1	96 ± 2	95 ± 2	95 ± 1	95 ± 2	96 ± 1	95 ± 2	96 ± 2
	B	94 ± 2	94 ± 2	94 ± 3	96 ± 2	94 ± 2	94 ± 2	95 ± 2	95 ± 2	95 ± 2	95 ± 2	95 ± 2	94 ± 2	94 ± 2	95 ± 2	94 ± 2	95 ± 2	95 ± 2	95 ± 2

## Sheet: LABORATORY HEALTH MARKERS
Supplementary Table 2.2 Summary of laboratory health markers by day and group.
The means and standard deviations (SD) values are showed. Control group (0.9% saline solution), Group A (30/2 mg GA/18β), Group B (90/4 mg GA/18β). References values: normal levels in healthy subjets.
Variable	Group	Day 0	Day 3	Day 8	Day 16	Day 30	Reference values
Blood Chemistry
Glucose (mg/dl)	CONTROL	91.30 ± 10.97	92.61 ± 15.48	95.17 ± 23.84	91.72 ± 11.60	93.82 ± 8.33	55 - 99
	A	88.0 ± 17.29	89.67 ± 12.39	89.32 ± 11.77	90.37 ± 10.94	91.47 ± 15.89
	B	86.15 ± 11.69	89.30 ± 12.25	90.58 ± 8.66	89.22 ± 12.49	89.21 ± 13.35
Glomerular Filtration Rate mL/min/1.73 m2	CONTROL	101.42 ± 17.06	101.64 ± 14.32	103.39 ± 13.16	99.05 ± 14.39	100.97 ± 12.71	90 - 120
	A	104. 42 ± 17.67	109. 86 ± 12.74	104.83 ± 23.83	105.45 ± 18.58	105.56 ± 14.39
	B	95.91 ± 16.02	94.92 ± 15.44	95.60 ± 14.19	94.58 ± 13.30	94.16 ± 16.30
Urea (mg/dl)	CONTROL	24.45 ± 12.02	26.89 ± 15.32	28.56 ± 10.04	29.67 ± 11.10	27.94 ± 9.99	14 - 50
	A	23.79 ± 9.65	24.00 ± 5.42	27.05 ± 9.63	27.47 ± 8.61	27.41 ± 6.22
	B	26.85 ± 7.91	28.55 ± 6.68	28.74 ± 5.96	28.22 ± 4.72	28.42 ± 5.89
Creatinine (mg/dl)	CONTROL	0.83 ± 0.12	0.82 ± 0.13	0.81 ± 0.10	0.85 ± 0.12	0.82 ± 0.12	0.5 - 1.2
	A	0.79 ± 0.23	0.73 ± 0.15	0.82 ± 0.33	0.80 ± 0.23	0. 77 ± 0.16
	B	0.83 ± 0.16	0.84 ± 0.14	0.83 ± 0.13	0.84 ± 0.15	0.84 ± 0.17
Uric Acid (mg/dl)	CONTROL	4.76 ± 1.75	4.74 ± 1.59	5.21 ± 1.62	5.21 ± 1.40	5.15 ± 1.54	2.4 - 7.0
	A	4.37 ± 1.15	4.41 ± 1.20	4.97 ± 1.16	5.07 ± 1.50	5.01 ± 1.66
	B	4.73 ± 1.33	4.69 ± 1.37	5.13 ± 1.31	5.21 ± 1.06	5.17 ± 1.37
Cholesterol (mg/dl)	CONTROL	172.60 ± 34.82	181.28 ± 36.33	198.33 ± 32.14	194.44 ± 38.32	189.18 ± 35.27	< 200
	A	173.42 ± 26.36	175.67 ± 24.34	194.00 ± 34.21	194.21 ± 39.36	184.18 ± 27.15
	B	168.30 ± 38.89	165.65 ± 37.82	176.53 ± 40.15	184.78 ± 33.13	188.89 ± 40.78
Triglycerides (mg/dl)	CONTROL	139.60 ± 56.00	175.00 ± 61.96	199.44 ± 95.25	179.56 ± 76.63	155.06 ± 58.91	< 150
	A	150.42 ± 57.05	170.00 ± 83.89	180.63 ± 109.92	145.84 ± 81.09	147.18 ± 89.31
	B	99.80 ± 29.72	124.25 ± 34.14	128.37 ± 57.56	113.72 ± 38.78	114.79 ± 29.78
Total Bilirubin (mg/dl)	CONTROL	0.43 ± 0.31	0.40 ± 0.22	0.41 ± 0.20	0.43 ± 0.31	0.46 ± 0.25	< 1.2
	A	0.37 ± 0.15	0.37 ± 0.16	0.43 ± 0.12	0.47 ± 0.15	0.40 ± 0.19
	B	0.49 ± 0.22	0.46 ± 0.25	0.56 ± 0.26	0.61 ± 0.28	0.58 ± 0.30
Direct Bilirubin (mg/dl)	CONTROL	0.17 ± 0.09	0.16 ± 0.07	0.16 ± 0.06	0.16 ± 0.08	0.18 ± 0.07	0.09 - 0.3
	A	0.15 ± 0.05	0.14 ± 0.04	0.16 ± 0.04	0.17 ± 0.05	0.16 ± 0.06
	B	0.19 ± 0.06	0.18 ± 0.07	0.21 ± 0.08	0.23 ± 0.08	0.21 ± 0.09
Indirect Bilirubin (mg/dl)	CONTROL	0.26 ± 0.22	0.24 ± 0.15	0.25 ± 0.15	0.27 ± 0.24	0.28 ± 0.18	0.01 - 0.9
	A	0.23 ± 0.10	0.24 ± 0.12	0.27 ± 0.09	0.29 ± 0.11	0.24 ± 0.14
	B	0.30 ± 0.16	0.29 ± 0.19	0.35 ± 0.19	0.38 ± 0.20	0.37 ± 0.22
Aspartate Aminotransferase (U/L)	CONTROL	23.85 ± 7.69	23.56 ± 10.05	27.50 ± 20.62	20.17 ± 7.08	21.41 ± 7.31	< 39
	A	31.95 ± 18.05	29.47 ± 23.28	29.53 ± 22.82	29.16 ± 23.14	32.24 ± 36.27
	B	23.50 ± 6.72	23.30 ± 9.44	22.95 ± 7.03	22.33 ± 7.50	20.37 ± 4.66
Alanine Aminotransferase (U/L)	CONTROL	25.50 ± 10.15	26.67 ± 9.30	31.22 ± 14.59	24.28 ± 11.01	22.94 ± 9.20	< 61
	A	43.42 ± 49.90	43.47 ± 54.18	46.26 ± 63.67	41.05 ± 55.20	45.47 ± 74.55
	B	26.20 ± 19.75	26.20 ± 18.10	26.11 ± 13.56	24.33 ± 13.82	22.47 ± 9.94
Alkaline Phosphatase (U/L)	CONTROL	96.35 ± 21.90	91.72 ± 21.94	91.89 ± 19.84	91.72 ± 20.53	89.06 ± 22.33	43 - 138
	A	84.11 ± 23.15	90.40 ± 22.18	86.11 ± 22.76	84.79 ± 17.51	87.59 ± 17.99
	B	89.75 ± 30.81	88.90 ± 27.87	85.84 ± 23.62	86.78 ± 20.12	88.58 ± 24.19
Gamma Glutamyl Transferase (U/L)	CONTROL	35.80 ± 25.06	40.17 ± 26.58	38.67 ± 23.92	33.78 ± 20.56	30.71 ± 18.15	8 - 61
	A	34.84 ± 27.29	37.53 ± 30.27	36.95 ± 30.50	35.37 ± 31.29	32.06 ± 33.58
	B	26.15 ± 18.31	27.20 ± 18.20	24.68 ± 13.30	20.44 ± 8.17	19.05 ± 7.31
Lactate Dehydrogenase (U/L)	CONTROL	161.60 ± 18.34	156.22 ± 21.33	188.33 ± 97.67	156.11 ± 23.63	149.35 ± 25.85	125 - 239
	A	173. 42 ± 36.09	168.33 ± 51.07	162.58 ± 28.99	155. 11 ± 30.20	155.88 ± 31.56
	B	167.00 ± 22.43	169.95 ± 32.38	162.21 ± 20.04	165.33 ± 25.60	157.37 ± 18.64
Calcium (mg/dl)	CONTROL	9.36 ± 0.38	9.39 ± 0.25	9.41 ± 0.28	9.49 ± 0.23	9.44 ± 0.36	8.6 - 10
	A	9.40 ± 0.58	9.33 ± 0.51	9.56 ± 0.40	9.63 ± 0.57	9.45 ± 0.57
	B	9.24 ± 0.32	9.26 ± 0.42	9.27 ± 0.41	9.39 ± 0.32	9.46 ± 0.39
Sodium (meq/L)	CONTROL	138.80 ± 2.19	139.28 ± 2.22	139.17 ± 2.92	139.72 ± 1.90	139.82 ± 2.56	136 - 145
	A	138.74 ± 1.97	139.00 ± 1.65	139.37 ± 2.36	139.37 ± 1.95	139.35 ± 2.09
	B	139.60 ± 2.82	139.75 ± 2.61	139.53 ± 3.17	139.39 ± 2.28	140.37 ± 1.42
Potassium (meq/L)	CONTROL	4.68 ± 0.52	4.84 ± 0.48	4.86 ± 0.58	4.98 ± 0.75	4.72 ± 0.52	3.5 - 5.1
	A	4.91 ± 0.42	4.82 ± 0.43	4.64 ± 0.33	4.62 ± 0.34	4.62 ± 0.37
	B	4.82 ± 0.62	4.88 ± 0.42	4.82 ± 0.40	4.77 ± 0.59	4.65 ± 0.50
Chlorine (meq/L)	CONTROL	102.55 ± 2.52	103.22 ± 1.90	103.56 ± 3.01	104.11 ± 2.42	103.76 ± 2.77	99 - 109
	A	97.76 ± 21.48	96.89 ± 24.00	97.87 ± 21.34	103.68 ± 2.67	104.41 ± 2.65
	B	103.30 ± 3.31	103.65 ± 1.98	104.00 ± 2.71	104.00 ± 2.66	140.84 ± 2.17
Phosphorus (mg/dL)	CONTROL	3.47 ± 0.38	3.41 ± 0.54	3.78 ± 0.64	3.83 ± 0.63	3.74 ± 0.75	2.5 - 4.5
	A	3.57 ± 0.48	3.81 ± 0.61	3.87 ± 0.64	3.99 ± 0.72	4.09 ± 0.80
	B	3.47 ± 0.43	3.40 ± 0.51	3.43 ± 0.71	3.74 ± 0.64	3.53 ± 0.56
Magnesium (mg/dL)	CONTROL	2.11 ± 0.14	2.11 ± 0.13	2.15 ± 0.14	2.12 ± 0.12	2.11 ± 0.14	1.6 - 2.6
	A	2.15 ± 0.20	2.16 ± 0.13	2.19 ± 0.15	2.12 ± 0.08	2.16 ± 0.11
	B	2.18 ± 0.16	2.18 ± 0.18	2.17 ± 0.17	2.18 ± 0.14	2.16 ± 0.14
C-reactive protein (mg/dl)	CONTROL	1.9 ± 2.2	0.7 ± 0.6	0.3 ± 0.3	0.3 ± 0.3	0.2 ± 0.2	< 0.5
	A	0.7 ± 0.6	0.3 ± 0.3	0.2 ± 0.1	0.2 ± 0.2	0.2 ± 0.1
	B	1.41 ± 1.09	0.58 ± 0.53	0.17 ± 0.14	0.19 ± 0.25	0.18 ± 0.24
Ferritin (ng/mL)	CONTROL	168.3 ± 112.7	172.8 ± 128.8	164.6 ± 122.0	123.1 ± 98.5	97.8 ± 82.9	13 - 400
	A	259.4 ± 196.3	261.7 ± 216.5	245.5 ± 195.6	191.3 ± 154.2	149.1 ± 121.8
	B	219.5 ± 202.5	220.7 ± 188.6	202.7 ± 197.0	165.5 ± 159.6	133.5 ± 142.2
Procalcitonin (ng/mL)	CONTROL	0.06 ± 0.03	0.04 ± 0.02	0.03 ± 0.02	0.04 ± 0.02	0.04 ± 0.02	< 0.5
	A	0.05 ± 0.03	0.04 ± 0.02	0.04 ± 0.02	0.04 ± 0.03	0.04 ± 0.02
	B	0.07 ± 0.03	0.05 ± 0.02	0.04 ± 0.02	0.04 ± 0.02	0.05 ± 0.02
D dimer (mg/mL de UEF)	CONTROL	0.4 ± 0.5	0.7 ± 1.7	0.4 ± 0.3	0.3 ± 0.2	0.3 ± 0.2	< 0.5
	A	0.5 ± 0.2	0.9 ± 1.5	0.4 ± 0.2	0.4 ± 0.2	0.4 ± 0.2
	B	0.4 ± 0.2	0.5 ± 0.4	0.4 ± 0.2	0.4 ± 0.2	0.3 ± 0.2
Erythrocyte Sedimentation Rate (mm/h)	CONTROL	15.4 ± 11.6	15.9 ± 12.9	8.3 ± 5.4	8.8 ± 6.5	11.5 ± 8.8	1 - 20
	A	9.2 ± 9.1	9.3 ± 9.3	7.6 ± 7.2	6.3 ± 6.5	8.5 ± 9.7
	B	7.2 ± 6.1	8.10 ± 6.31	8.16 ± 11.28	6.2 ± 4.1	9.8 ± 9.4
Blood Biometry
Leukocytes (miles/mL)	CONTROL	5.68 ± 1.78	5.59 ± 1.99	6.65 ± 1.83	6.60 ± 1.57	6.62 ± 1.35	3.6 - 11.6
	A	5.04 ± 1.18	5.01 ± 1.23	6.32 ± 1.68	6.16 ± 1.36	6.09 ± 1.15
	B	5.09 ± 1.23	5.07 ± 0.90	6.21 ± 1.23	6.25 ± 1.35	6.15 ± 1.52
Hemoglobin (g/dl)	CONTROL	15.54 ± 1.77	15.38 ± 1.78	15.32 ± 1.73	14.79 ± 2.03	14.94 ± 1.89	12.0 - 18.0
	A	15.47 ± 1.75	14.99 ± 1.83	14.96 ± 1.63	14.66 ± 1.64	14.93 ± 2.12
	B	15.49 ± 1.41	15.49 ± 1.24	15.02 ± 1.40	14.87 ± 1.38	15.08 ± 1.30
Platelets (miles/mL)	CONTROL	256.65 ± 64.99	283.06 ± 66.68	332.06 ± 63.44	319.67 ± 63.17	289.06 ± 57.55	150 - 500
	A	262.42 ± 60.83	269.13 ± 87.15	309.68 ± 61.19	314.95 ± 66.96	270.43 ± 50.66
	B	254.95 ± 64.12	275.20 ± 80.80	326.58 ± 99.59	327.11 ± 85.15	281.95 ± 86.51
Neutrophils %	CONTROL	57.83 ± 8.56	50.63 ± 9.31	54.38 ± 6.67	56.07 ± 7.87	54.75 ± 6.82	38.4 - 74.6
	A	54.12 ± 8.36	50.65 ± 8.38	56.01 ± 8.97	57.31 ± 8.13	54.30 ± 5.45
	B	54.26 ± 6.68	49.80 ± 8.06	53.96 ± 7.72	53.41 ± 6.56	52.44 ± 7.90
Neutrophils (miles/mL)	CONTROL	3.37 ± 1.33	2.95 ± 1.47	3.67 ± 1.26	3.75 ± 1.22	3.65 ± 0.93	1.69 - 7.16
	A	2.77 ± 0.93	2.67 ± 0.61	3.57 ± 1.33	3.59 ± 1.12	3.34 ± 0.86
	B	2.81 ± 0.92	10.52 ± 35.43	3.41 ± 1.05	3.40 ± 1.07	3.30 ± 1.20
Lymphocytes %	CONTROL	30.28 ± 7.51	38.71 ± 9.14	34.68 ± 6.63	32.76 ± 7.50	33.82 ± 6.54	16.5 - 49.6
	A	32.94 ± 7.22	38.86 ± 7.55	33.73 ± 8.34	31.96 ± 7.10	33.66 ± 5.52
	B	32.07 ± 7.98	39.42 ± 8.00	34.47 ± 7.42	34.42 ± 6.81	34.86 ± 8.34
Lymphocytes (miles/mL)	CONTROL	1.65 ± 0.47	2.06 ± 0.52	2.27 ± 0.64	2.12 ± 0.56	2.22 ± 0.57	1.05 - 3.53
	A	1.63 ± 0.42	1.93 ± 0.56	2.06 ± 0.50	1.92 ± 0.44	2.01 ± 0.32
	B	1.59 ± 0.40	1.98 ± 0.44	2.09 ± 0.39	2.11 ± 0.40	2.07 ± 0.39
